# Supplementary material for: Geraniol as a Potential Stimulant for Improving Anthocyanin Accumulation in Grape Berry Skin through ABA Membrane Transport
Source: MDPI journal article supplement (doi:10.3390/plants11131694), 2022-06-27
Supplement: s1 [file s1]

Supplementary Table S1 Sequences of primers for real-time RT-PCR

| Name                                   | Sequence                     | GenBank accession |
|----------------------------------------|------------------------------|-------------------|
| <i>VvmybA1</i> (forward)               | 5'-ATCCCAGAAGCCCACATCAA-3'   | AB111101          |
| <i>VvmybA1</i> (reverse)               | 5'-GCAAGCCTCAGGACAGAAGAA-3'  | AB111101          |
| <i>VvUFGT</i> <sup>a</sup> (forward)   | 5'-CTTCTTCAGCACCAGCCAATC-3'  | AB047099          |
| <i>VvUFGT</i> (reverse)                | 5'-AGGCACACCGTCGGAGATAT-3'   | AB047099          |
| <i>VvABCG40</i> <sup>b</sup> (forward) | 5'-AGCCCTTCTTCACCCAATTT-3'   | NM_001301124      |
| <i>VvABCG40</i> (reverse)              | 5'-CCCAAGGAAGAGAACAGCAG-3'   | NM_001301124      |
| <i>VvNCED1</i> <sup>c</sup> (forward)  | 5'-GAGACCCCAACTCTGGCAGG-3'   | AY337613          |
| <i>VvNCED1</i> (reverse)               | 5'-AAGGTGCCGTGGAATCCATAG-3'  | AY337613          |
| <i>VvPP2C24</i> <sup>d</sup> (forward) | 5'-TTAAAGCCCTTCGTGAGCTG-3'   | XM_002282572      |
| <i>VvPP2C24</i> (reverse)              | 5'-GACACCACGTCCCACAGAC-3'    | XM_002282572      |
| <i>β-actin</i> (forward)               | 5'-CAAGAGCTGGAAACTGCAAAGA-3' | AF369524          |
| <i>β-actin</i> (reverse)               | 5'-AATGAGAGATGGCTGGAAGAGG-3' | AF369524          |

<sup>a</sup>UFGT, UDP glucose flavonoid 3-*O*-glucosyl transferase

<sup>b</sup>ABCG40, ABC transporter G family protein 40

<sup>c</sup>NCED1, 9-cis-epoxycarotenoid dioxygenase 1

<sup>d</sup>PP2C24, highly ABA-induced type 2Cprotein phosphatase 24
